# Porcine Models of Muscular Dystrophy<sup>1</sup>

Joshua T. Selsby, Jason W. Ross, Dan Nonneman, and Katrin Hollinger

Joshua T. Selsby, PhD, and Jason W. Ross, PhD are associate professors of Animal Science at Iowa State University, Ames, IA 50011. Dan Nonneman, PhD, is a research molecular biologist at the USDA<sup>2</sup>, ARS, U.S. Meat Animal Research Center, Clay Center, NE 68933. Katrin Hollinger, PhD, was a graduate student in Genetics at Iowa State University, Ames, IA 50011

Address correspondence and reprint requests to Joshua Selsby, 2356 Kildee Hall, Ames, IA 50011 or email [jselsby@iastate.edu](mailto:jselsby@iastate.edu)

## Abstract

Duchenne muscular dystrophy is a progressive, fatal, X-linked disease caused by a failure to accumulate the cytoskeletal protein dystrophin. This disease has been studied using a variety of animal models including fish, mice, rats, and dogs. While these models have contributed substantially to our mechanistic understanding of the disease and disease progression, limitations inherent to each model have slowed the clinical advancement of therapies, which necessitates the development of novel large-animal models. Several porcine dystrophin-deficient models have been identified, although disease severity may be so severe as to limit their potential contributions to the field. We have recently identified and completed the initial characterization of a natural porcine model of dystrophin insufficiency. Muscles from these animals display characteristic focal necrosis concomitant with decreased abundance and localization of dystrophin-glycoprotein complex components. These pigs recapitulate many of the cardinal features of muscular dystrophy, have elevated serum creatine kinase activity, and preliminarily appear to display altered locomotion. They also suffer from sudden death preceded by EKG abnormalities. Pig dystrophinopathy models could allow refinement of dosing strategies in human-sized animals in preparation for clinical trials. From an animal handling perspective, these pigs can generally be treated normally, with the understanding that acute stress can lead to sudden death. In summary, the ability to create genetically modified pig models and the serendipitous discovery of genetic disease in the swine industry has resulted in the emergence of new animal tools to facilitate the critical objective of improving the quality and length of life for boys afflicted with such a devastating disease.

**Key words:** Becker muscular dystrophy; disease model; DMD; Duchenne muscular dystrophy; dystrophin; mdx; pig

## Introduction

The dystrophin gene, found on the X chromosome, is among the largest in the mammalian genome and is more than 2 megabases in length. When fully transcribed and translated, a

427 kDa full-length protein is produced from 79 exons, although several smaller transcripts can also originate from the same gene (Koenig et al. 1987; Muntoni et al. 2003). The dystrophin protein is a functional link between the actin cytoskeleton and

1 Mention of trade names or commercial products in this publication is solely for the purpose of providing specific information and does not imply recommendation or endorsement by the U.S. Department of Agriculture.

2 The U.S. Department of Agriculture (USDA) prohibits discrimination in all its programs and activities on the basis of race, color, national origin, age, disability, and where applicable, sex, marital status, familial status, parental status, religion, sexual orientation, genetic information, political beliefs, reprisal, or because all or part of an individual's income is derived from any public assistance program. (Not all prohibited bases apply to all programs.) Persons with disabilities who require alternative means for communication of program information (Braille, large print, audiotape, etc.) should contact USDA's TARGET Center at (202) 720-2600 (voice and TDD). To file a complaint of discrimination, write to USDA, Director, Office of Civil Rights, 1400 Independence Avenue, S.W., Washington, D.C. 20250-9410, or call (800) 795-3272 (voice) or (202) 720-6382 (TDD). USDA is an equal opportunity provider and employer.

the dystrophin glycoprotein complex (DGC). Through the DGC, dystrophin transmits force produced during muscle contraction to large extracellular proteins and ultimately to tendons and bones. The dystrophin protein contains four hinge regions and a long rod domain composed of spectrin-like repeats (for review [Le Rumeur et al. 2010](#)) and helps to protect the sarcolemma from injury, particularly during eccentric contractions. In the case of dystrophin deficiency, this functional connection is lost, as is the capacity to transmit force via this mechanism along with DGC component abundance and complex assembly. Dystrophin deficiency results in a disease called Duchenne muscular dystrophy (DMD).

DMD is most commonly caused by deletions in the dystrophin gene, although point mutations and duplications also contribute to the DMD population ([Aartsma-Rus et al. 2006](#)). In total, approximately two thirds of cases are inherited, with the remainder resulting from de novo mutations ([Laing 1993](#)). Boys lacking the dystrophin protein product are afflicted with deteriorating muscles and a devastating prognosis that is typically observed with locomotor deficits in early preschool years, progressing toward death as a result of the failure of muscles supporting cardiac and respiratory function. Becker muscular dystrophy (BMD) is also caused by dystrophin mutations, resulting in either a failure to accumulate sufficient full-length dystrophin and/or the accumulation of a truncated dystrophin gene product. Often this is the result of a deletion that maintains the open reading frame. Disease severity is highly variable in boys with BMD and ranges from nearly asymptomatic to severity that closely parallels that seen in DMD ([Beggs et al. 1991](#); [Nicolas et al. 2015](#)).

Whether through increased sarcolemmal  $\text{Ca}^{2+}$  permeability ([Liu et al. 2005](#); [Lynch 2004](#); [Moens et al. 1993](#); [Morris et al. 2010](#); [Petrof et al. 1993](#); [Selsby et al. 2010](#)) or  $\text{Ca}^{2+}$  channel dysfunction ([Franco and Lansman 1990](#); [Lansman and Franco-Obregon 2006](#); [Tutdibi et al. 1999](#)), it is clear that dystrophic muscle suffers a loss of  $\text{Ca}^{2+}$  homeostasis. In terms of cellular function, loss of  $\text{Ca}^{2+}$  control leads directly to increased proteolysis. Indeed, both increased activation of calpains and the proteasome system are widely reported in dystrophic skeletal muscle ([Selsby et al. 2010](#); [Spencer and Mellgren 2002](#)). Further, mitochondria become a secondary sink for  $\text{Ca}^{2+}$  storage leading to mitochondrial and metabolic dysregulation ([Basset et al. 2006](#); [Vandebrouck et al. 2006](#)). Superoxide production and free radical injury are increased in dystrophic muscle ([Selsby 2011](#); [Tidball and Wehling-Henricks 2007](#)), likely due to increased calpain activity and mitochondrial dysfunction. The combination of increased cytosolic  $\text{Ca}^{2+}$ , free radical production, and mitochondrial dysfunction and apoptotic signaling ([Basset et al. 2006](#); [Tews 2006](#)) in dystrophic muscle unfortunately culminates in myonuclear loss and muscle fiber death. This cellular stress contributes to an inflammatory response, further contributing to muscle injury. There is growing evidence that suppressed autophagy may also be contributing to disease severity ([De Palma et al. 2014](#); [Hollinger et al. 2013](#)).

While there are numerous secondary pathologies contributing to disease severity, each represents a potential therapeutic target. In addition, the goal of several novel treatment strategies is to convert DMD patients to BMD patients and thereby mitigate disease severity. In one such approach, protein abundance of utrophin, a dystrophin-related protein, is elevated. Numerous reports have established that utrophin and dystrophin are structurally similar ([Blake et al. 1996](#)), although not identical ([Li et al. 2010](#)), such that utrophin can serve as an adequate substitute for dystrophin in the absence of dystrophin ([Tinsley et al.](#)

[1998](#)). In addition, utrophin may play a role in satellite cell function, DGC localization, smooth muscle function, and expression of dystrophin splice variants, any one of which could potentially affect muscle function and metabolism ([Cohn et al. 2002](#); [Deconinck et al. 1997](#); [Rafael et al. 2000](#)). In another approach called exon skipping, exons containing errors are artificially spliced out, serving to reestablish the correct reading frame, although it also results in the production of a truncated dystrophin protein product ([Anthony et al. 2012](#); [Mendell et al. 2013](#)). Lastly, gene therapy techniques attempt delivery of a miniaturized utrophin or dystrophin gene to allow effective packaging in adeno-associated viral particles. Termed micro-utrophins ([Odom et al. 2008](#)) and micro-dystrophins ([Shin et al. 2013](#)), these protein products have shown efficacy in animal models. Hence, in addition to DMD, studies related to BMD are urgently needed, as the BMD population seems likely to expand. A requisite requirement for the development of therapies for dystrophinopathies is animal models in which to test these important therapeutic approaches.

## Conventional Animal Models of Dystrophinopathy

### mdx Mouse

The mdx mouse is the research animal most commonly used to study DMD. In the mdx mouse, dystrophic pathology is caused by a point mutation in exon 23 leading to formation of a stop codon and subsequently truncated protein ([Bulfield et al. 1984](#)). More recently, mutagenesis techniques have generated at least four novel mutations in the mouse dystrophin gene that are designated  $\text{mdx}^{2cv-5cv}$  ([Cox et al. 1993](#); [Im et al. 1996](#)). In addition to these models, two mouse dystrophin knockout models have also been developed ([Kudoh et al. 2005](#); [Wertz and Fuchtbauer 1998](#)). The mdx mouse is an extremely well characterized model of DMD and has been invaluable in the understanding of disease pathogenesis and improving our mechanistic understanding of the disease. Further, it is widely used in the development of new therapies.

However, for all of the many useful features of mdx mice, there are a few significant drawbacks. For example, the disease phenotype exhibited by mdx mice is much milder than that of human DMD patients. These animals continue to be mobile, experience very little limb muscle fibrosis or adiposity, exhibit no significant contractures, and have only a mildly reduced life span ([Banks and Chamberlain 2008](#); [Chamberlain et al. 2007](#)). To date, several reasons explaining these observations have been advanced, though little data supporting or refuting them have been published. It could be that their small size and four-legged means of locomotion spares muscles from continued cycles of degeneration and regeneration ([Wells and Wells 2005](#)). Alternatively, mice may have an inherently larger and/or faster means of muscle regeneration than do humans ([Wells and Wells 2005](#)). Further, in mdx mice, expression of utrophin is higher than in corresponding muscle from healthy mice and may be better able to compensate for dystrophin deficiency in mice than in humans ([Law et al. 1994](#)). As these were recognized as potential confounding variables, an  $\text{mdx/utrophin}^{-/-}$  mouse line was developed, which has a far more severe phenotype ([Deconinck et al. 1997](#)). Indeed, a number of additional mutations have been superimposed on the mdx model in an effort to increase disease severity (e.g., [Sacco et al. 2010](#)). While the disease phenotype is typically far more severe in these models, they are no longer accurate genetic models of the human disease as these new

knockouts often increase disease severity independent of the dystrophin mutation.

Additionally, in many instances, there is a poor correlation between effectiveness of therapies in mouse models to that observed in human models (Duan 2011; Wells and Wells 2005). Indeed, scaling up from a mouse to a dog or human presents a number of challenges for conventional drug interventions as well as gene and stem cell transfer-based approaches (discussed below).

### Golden Retriever Muscular Dystrophy (GRMD) Model

Identification and characterization of a larger dystrophin-deficient animal model would contribute greatly to the advancement of our understanding of the disease as well as our ability to treat it. As a result, the GRMD model has been used extensively among some research groups. In the GRMD model, the dystrophin gene has a mutation in the 3' end of intron 6 that results in the aberrant exclusion of exon 7 during splicing, and a frame shift, which introduces a stop codon in exon 8 (Sharp et al. 1992). This model features a phenotype that is similar in severity and selective muscle injury to that seen in human patients (Kornegay et al. 2003). Finally, these dogs are more similar in size to human patients, helping to ease issues related to project scale-up (Duan 2011; Wells and Wells 2005).

Despite these positive aspects of the GRMD model, several deficiencies warrant consideration of new large-animal models of DMD. GRMD dogs have a high degree of variability, despite an identical causative mutation (Cooper et al. 1988; Shimatsu et al. 2003). It is likely that at the root of this issue is variation in the expression of alternatively spliced dystrophin gene products and expression of resultant truncated translational products in the muscles of GRMD dogs, leading to great phenotypic range (Banks and Chamberlain 2008; Schatzberg et al. 1998). This may be indicative of other underlying differences between the canine and human diseases. While identification of mediators of this differential expression is important and has great potential for large therapeutic impacts, the high phenotypic variability makes determining end points difficult and confounds data interpretation (Bretag 2007). For example, despite being dystrophin deficient, Ringo, a member of a Brazilian GRMD colony, behaves normally (running, jumping, opening a door while on hind limbs, and breeding) (Ambrosio et al. 2008). Furthermore, dystrophic dogs treated with corticosteroids exhibited a greater frequency of calcified necrotic fibers and impairment of some measures of muscle function (Liu et al. 2004). This is of great importance because corticosteroids have been routinely used in the care of human DMD patients since the 1970s and have consistently improved muscle function. As corticosteroids are the standard of care, it is important to determine how novel drugs may interact with corticosteroids in an animal model. Because corticosteroids exacerbate the disease in the GRMD model, it is not the ideal large-animal model in which to make these comparisons. Despite the many favorable attributes of the dog model of DMD, several deficiencies remain, necessitating the continued search for alternative large-animal models of DMD.

### Other Dystrophinopathy Models

The hypertrophic feline muscular dystrophy (HFMD) cat analog of DMD was first diagnosed in a companion animal. Different spontaneously occurring mutations can lead to HFMD, however these mutations appear to be located at the muscle and Purkinje promoter of the dystrophin gene (Gambino et al. 2014; Winand

et al. 1994). The feline model is rarely used as a research animal because tongue and diaphragm hypertrophy lead to feeding difficulties, animal welfare concerns, and death (Carpenter et al. 1989; Gaschen et al. 1992).

Two independent labs have recently employed genome editing tools to induce dystrophin mutations in rats (Larcher et al. 2014; Nakamura et al. 2014). Nakamura and colleagues used clustered, interspaced short palindromic repeats (CRISPR)/Cas to induce deletions in exon 3 and/or exon 16 in inbred Wistar-Imaichi rats. The rats showed muscle pathology consistent with DMD; however, there was large variation in severity between individual animals (Nakamura et al. 2014). A stop codon in exon 23, as found in the mdx mouse, was created in rats by Larcher and colleagues utilizing transcription activator-like effector nucleases (TALEN). The *Dmd*<sup>mdx</sup> rats have a phenotype similar to human DMD patients including fatty infiltration and a cardiac defect. In outbred Sprague-Dawley rats carrying this mutation, the phenotype is also consistent between animals. A benefit of rat models is that rats are relatively easy to work with and have inexpensive husbandry needs compared with large animals. However, issues related to scale up, like in the mouse, would seem to limit the usefulness of these models as translational tools.

Zebrafish dystrophinopathy models are commonly used non-mammalian models of DMD. Two strains are available: *sapje*, with a nonsense mutation in exon 4, and *sapje-like*, with a deletion of exon 62 leading to a stop codon in exon 63 (Bassett et al. 2003; Guyon et al. 2009). Since zebrafish embryos are translucent, muscle damage can be visualized and quantified using polarized light (Berger et al. 2012). The straightforward quantification facilitates high throughput screening of disease-modifying compounds (Kawahara et al. 2011; Waugh et al. 2014), testing the efficacy of potential treatments (Berger et al. 2011; Li et al. 2014), and studies of disease pathology (Alexander et al. 2013; Bassett et al. 2003). Even though zebrafish have proteins orthologous to those in the mammalian DGC (Chambers et al. 2001), there are limitations to using zebrafish models including differences in taxonomy class, locomotion, and size.

### Rationale for Porcine Models of Dystrophinopathy

Despite the fact that DMD remains the most common fatal, X-linked disease, development of therapeutic interventions is moving at an alarmingly slow rate. Certainly, current animal models have been essential in aiding our understanding of DMD and have made contributions as preclinical models. However, their differences in body size, disease presentation, and response to therapeutic interventions compared with humans have hindered progress toward advances in patient care. With a porcine model available, we anticipate that preclinical trials would be far more representative and predictive of human outcomes, because the pig genome is three times more similar to that of the human than is the mouse (Wernersson et al. 2005) and is much closer in anatomical size to humans than is the mouse or dog.

As noted above, a significant hurdle is appropriately scaling experimental medications from doses given to a mouse or dog to those appropriate for a human patient. In many instances, the dog is omitted from the translational pipeline, hence more commonly the hurdle is scaling therapies from mouse to human. In addition to differences in body size, there are also differences in body composition, metabolic rate, and biological chemistry that contribute to varied or underwhelming responses

in humans despite strong preclinical data demonstrating efficacy in mice. Failure to appropriately dose human subjects results in a failure to accumulate sufficient drug-of-interest in the blood and/or target tissues or to effect a desired modification of targeted pathway activity. It may cause significant side effects leading to failure of the clinical trial.

Similar to conventional intervention, scale up of gene therapy approaches also faces significant challenges. Intramuscular gene transfer and intravascular delivery of virus for whole-body transfection have become routine in mouse models (Gregorevic et al. 2006, 2008; Zhang and Duan 2012). Unlike the mdx mouse, after intramuscular viral delivery of microdystrophin to DMD patients, no transgene was detected (Mendell, Campbell, et al. 2010). This may be due, in part, to an immune response to the transgene. The viral vector itself can also provoke an immune response in patients (Mendell, Rodino-Klapac et al. 2010; Mingozi et al. 2007), which could interfere with transgene expression. Because of the immune response encountered with intramuscular delivery, there is concern that the higher titers required for systemic perfusion could trigger a stronger immune response, which would be counter to the efficacy of the intervention and well-being of the patient. Further, delivering virus directly to the entirety of the musculature is logistically impractical. Large-animal models can facilitate the optimization of approaches for systematic viral delivery while at the same time evaluating the immunological responses in multiple species.

Given these current problematic issues of scale-up, a model of human size would seem to be an invaluable tool. Minipigs (i.e., NIH minipig, Yucatan) can be managed to reach a size of ~150 lbs at one year of age and ~200 pounds at two years of age. Domestic pigs used for agriculture can reach nearly 300 pounds by six months of age and may exceed 500 pounds by one year of age. An advantage of the larger size makes biopsies possible such that longitudinal studies could be performed on the same animal. Furthermore, logistics of scale-up, including dosages, titers, injection sites, dosing regimens, etc., could be better defined prior to use in DMD patients. This has the cumulative benefit of reducing the cost of clinical trials because (1) a very thorough preclinical trial featuring pigs would be much cheaper than most human clinical trials, (2) clinical trials could contain fewer groups as dose determination and scale-up methods have already been determined, and (3) interventions that would fail because of limitations to scale-up or other toxicities discovered in moving to large animals could be halted at the preclinical stage.

In addition to skeletal muscle dysfunction, dystrophinopathy patients suffer a progressive cardiomyopathy. Indeed, respiratory support therapies have been so successful in protecting respiratory function that cardiomyopathy is growing in frequency as the cause of death for DMD patients (McNally 2007). Hence, it is imperative that models of DMD have a cardiovascular system comparable to the human cardiovascular system so that interventions will be in the appropriate physiological context. In that regard, porcine and human hearts are similar in terms of cardiac output, stroke volume, mean arterial pressure, heart rate, and perfusion (Crick et al. 1998; Thein and Hammer 2004). Moreover, the porcine heart is so similar to the human heart that, in preparation for xenotransplantation, transgenic pigs designed to reduce rejection have been developed (Ezzelarab et al. 2009; Lai et al. 2002; Weiss et al. 2009), while pig xenographs are currently being used in humans for valve replacements as well as aortic root replacements (Kon et al. 1999; LeMaire et al. 2009). Finally, a model with a cardiomyopathy provides an opportunity to study the mechanism of this feature of dystrophinopathy as well as a platform to test potential interventions.

## Transgenic Porcine Models of Dystrophinopathy

A tremendous amount of progress has been made in the last decade with respect to genetically engineering pigs with specific defects to recapitulate human disease phenotypes in a desirable pig genetic background (Prather et al. 2013; Yang and Ross 2012). The ability to make pigs carrying specific genetic modifications has been accomplished through somatic cell nuclear transfer (Rogers et al. 2008; Ross et al. 2012) and through the implementation of new gene-editing technologies such as TAL effector nucleases (TALENs) (Prather et al. 2013) and the use of the CRISPR/Cas9 system (Whitworth et al. 2014).

We and others have pursued this genome modification approach, resulting in the emergence of several new models of dystrophinopathies in pigs. In 2013, Klymiuk and colleagues reported a transgenic pig model with the exon corresponding to human dystrophin exon 52 replaced with a neomycin selectable marker cassette. The deletion of the exon resulted in a +1 frame shift after the splicing of exon 51 to 53 (Klymiuk et al. 2013). The model produces some of the cardinal features of DMD in humans, such as absence of dystrophin protein, a reduction in the abundance and localization of DGC components, elevated serum creatine kinase activity, and progressive fibrosis of muscle. The model though is not without some significant drawbacks. At a molecular level, the model appears to express significantly greater utrophin than wild-type counterparts, a shortcoming of the mdx mouse. Further, the severity of the disease in this pig model is so great as to significantly limit its use as a research tool as the majority of affected offspring died within the first week of life. Hence, the opportunity to identify biomarkers prior to an observable physical phenotype is greatly reduced, as is the ability to introduce a therapeutic intervention early enough in the course of the disease to curb disease progression and severity over time.

Information regarding another porcine model of muscular dystrophy is available only through the U.S. patent office (Exemplar Genetics Patent US 20140223589 A1). The patent claims that these miniature pigs possess an exon 52 deletion and demonstrate several characteristics consistent with DMD phenotypes observed in boys with the disease, such as elevated serum creatine kinase activity and lack of a functional dystrophin protein. While several key features of this model still require further characterization to determine its full potential, this model is promising. Of potential concern is that the genetics of this model appears to cause the same mutation (exon 52 deletion) as the transgenic dystrophin knockout model above (Klymiuk et al. 2013). Hence, there is the expectation that the severity of the disease would be similar, although until the details of the model are peer reviewed this is speculative.

We have also pursued the development of a miniature pig model of muscular dystrophy. Our modification, accomplished by the introduction of a neomycin selectable marker cassette via homologous recombination, results in the in-frame deletion of an exon in the rod domain of the dystrophin protein (Ross et al., unpublished observations). We have recently begun producing males carrying the modification. Anecdotally, they appear to develop fairly normally for the first two months of life. Both phenotypic and molecular characterizations at multiple time points in the first year are underway to determine the extent to which this model recapitulates fundamental features of dystrophinopathies. Our expectation is that an in-frame dystrophin mutation in the pig would result in a milder dystrophinopathy in comparison with other existing transgenic pig models, such as



the one developed by Klymiuk and colleagues (2013). An additional advantage of a miniature BMD-like model would be their research importance in the event of successful deployment of exon-skipping drugs, which would dramatically increase the number of boys with a BMD-like phenotype.

While genetic modification of the pig genome offers the ability to create and utilize important animal models, the use of transgenic pig models is hampered by federal regulations limiting rapid, widespread use and distribution of the animals (Maxmen 2012). Alternatively, the U.S. swine industry produces over 100 million pigs per year. While the swine industry does not actively pursue the identification of phenotypes for use as biomedical models, some mutations have been identified, such as pigs with malignant hyperthermia (MH) (Fujii et al. 1991), severe combined immunodeficiency (SCID) (Ewen et al. 2014), and our porcine BMD model (see below) (Hollinger et al. 2014; Nonneman et al. 2012). These discoveries of spontaneously occurring disease models are capable of making an impact on the biomedical research community without the complications of regulatory efforts associated with monitoring transgenic animals.

## A Spontaneous Porcine Dystrophinopathy Model

### Discovery

A porcine stress syndrome symptomatically similar to ryanodine receptor 1 (RYR1)-mediated porcine stress syndrome was discovered in the U.S. Meat Animal Research Center's swine research population when two male siblings died of apparent stress after transport at 12 weeks of age (Nonneman et al. 2012). Because the population was free of the RYR1 mutation, it was initially thought it could be an allelic form of porcine stress syndrome or MH. To evaluate candidate genes associated with the stress syndrome, the coding regions of porcine orthologs of human MH genes RYR1, calcium channel, voltage-dependent, L type, alpha 1S subunit (CACNA1S), carnitine palmitoyltransferase 2 (CPT2), and ryanodine receptor 2 (RYR2) were sequenced for SNP discovery and mutation detection in the proband's family. There were no obvious mutations identified when normal and affected siblings were compared, and the syndrome did not cosegregate with SNP alleles in any of the human MH candidate genes. Matings were made with the original sire, dam, and daughters to generate additional offspring to characterize the genetic basis of this syndrome. A pedigree of 250 animals that included 49 affected pigs was genotyped with the Illumina PorcineSNP60 beadchip (Ramos et al. 2009), and a single region on the X chromosome (29–32 Mb) was associated with the stress syndrome. The two most significant markers on the beadchip (ALGA0099513 and ALGA0099514) are located in intron 44 of the dystrophin gene (Nonneman et al. 2012).

### Genetics

After discovering that the dystrophin gene was associated with the stress syndrome, the exons and flanking intron boundaries of DMD were sequenced from normal and affected pigs, and no polymorphisms were identified near splice sites. Amplification and sequencing of skeletal muscle cDNA from normal and affected animals revealed no evidence of alternative splicing or deletion of exons in the affected animals. Polymorphisms in the promoter regions (P1, P2, and the muscle-specific promoter) did not segregate with the disease. Six nonsynonymous polymorphisms were found in the coding region (Table 1), and only one of these nonsynonymous changes, 85890\_783, which causes the amino acid change arginine to tryptophan at amino acid 1958 (R1958W) in exon 41, was significantly associated with the stress syndrome. This SNP was as highly associated with the stress response as the two most significant SNPs in intron 44 on the Illumina PorcineSNP60 Beadchip. The C allele (arginine) was found in all unaffected animals, and the T allele (tryptophan) was hemizygous in affected males and heterozygous in carrier females. This change was predicted by PolyPhen-2 (<http://genetics.bwh.harvard.edu/pph2/>) to be damaging with a probability score of 0.983 (Nonneman et al. 2012).

To further characterize this variant, additional sequencing of the locus in this population was performed. Because of the size of the dystrophin gene, a DNA capture array (Agilent, Santa Clara, CA) was designed for 2.33 Mb of pig genomic sequence spanning the DMD gene and included 146 kb upstream of the first exon and 20 kb downstream of the last exon. The variation between affected and normal pigs and two normal pools of Duroc/Yorkshire and Landrace boars showed that affected pigs shared a common haplotype that extended for about 750 kb, corresponding to a region ranging from intron 40 to intron 59 of the dystrophin gene (DJ Nonneman, GA Rohrer, unpublished observations). This region includes the arginine to tryptophan substitution in exon 41 and the two most significant Illumina Beadchip markers. This shared haplotype implies that the mutation resides in this interval, and no other mutations were found in this region. Thus the hypothesis that the Arg-Trp mutation is responsible for the phenotype is strongly supported by the genetic evidence.

### Phenotype

In affected pigs, dystrophin abundance was decreased in all muscles by ~70% when assessed by Western blot; however, using an immunohistochemical approach, the reduction in dystrophin localization was noted in the diaphragm (70% reduction) and the longissimus (90% reduction) but not the psoas (45% numerical reduction) (Hollinger et al. 2014; Nonneman et al. 2012).

**Table 1.** Nonsynonymous polymorphisms in pig DMD and their associations with the stress-induced phenotype

| Marker      | Nucleotide | Polymorphism <sup>a</sup> | Amino Acid | Location  | p-value                  |
|-------------|------------|---------------------------|------------|-----------|--------------------------|
| 84000_82    | 1349       | CRA                       | R396G      | Exon 11   | 0.002                    |
| 84002_411   | 1629       | CAS                       | H489Q      | Exon 12   | 0.0002                   |
| 84339_200   | 2102       | ARC                       | N647S      | Exon 16   | 0.406                    |
| 84339_333   | 2235       | ACR                       | T691T      | Exon 16   | 0.559                    |
| 85890_783   | 6034       | YGG                       | R1958W     | Exon 41   | 1.06 × 10 <sup>-23</sup> |
| ALGA0099513 |            |                           |            | Intron 44 | 2.19 × 10 <sup>-23</sup> |
| ALGA0099514 |            |                           |            | Intron 44 | 2.19 × 10 <sup>-23</sup> |
| 85904_613   | 7274       | CYG                       | L2371P     | Exon 49   | 0.005                    |

<sup>a</sup>Polymorphisms are shown by their IUB code within the codon.

Likewise,  $\alpha$ -sarcoglycan and dystroglycan abundance and localization followed a similar pattern in these muscles (Fortunato et al. 2014; Hollinger et al. 2014). Litter size and sex distribution of offspring were consistent with that found in a typical production line, suggesting that dystrophin insufficiency does not affect in utero survival. Further, growth of affected pigs and healthy littermates was similar throughout the first 12 months of life. Visually, pigs containing the polymorphism causing dystrophin insufficiency appear similar to their unaffected littermates throughout the first 12 months of life. Consistent with disease-related muscle injury, serum creatine kinase activity is increased in affected animals compared with healthy littermates. At two months of age, a detailed histological study using several muscles was conducted, which revealed focal necrotic lesions in some, but not all, muscles selected for investigation (Hollinger et al. 2014). For example, the diaphragm and longissimus contained necrotic lesions; however, the psoas did not. It is unclear if the muscle-specific response is due to frequency and type of muscle use, where the diaphragm and longissimus are used regularly and the psoas is used sparingly. Alternatively, the fiber-type distribution may also affect muscle injury because the psoas is largely type I, which has been shown to be resistant to dystrophic injury relative to other fiber types (Webster et al. 1988). Indeed, a novel therapeutic approach is to increase the frequency of type I fibers within a muscle group as the complement of proteins associated with the type I phenotype appears protective to dystrophic injury (Hollinger et al. 2013; Ljubicic et al. 2011; Selsby et al. 2012). It is also unclear if the dystrophic psoas contains less injury as a cause or an effect of the higher degree of dystrophin and DGC localization.

Cardiomyopathy is another important consideration for animal models of dystrophinopathies because it is quickly becoming the leading cause of death for dystrophinopathy patients. In this pig model, the myocardium appears free from lesions at two months of age despite dystrophin insufficiency (JT Selsby, JW Ross, DJ Nonneman, K Hollinger, unpublished observations). At 12 months of age, foci of necrosis are apparent, indicating a deteriorating myocardium, which is consistent with the human disease (Nonneman et al. 2012). Regardless of age, these pigs are susceptible to a stress-mediated sudden death. Early experiments implicated the ryanodine receptor because inhalation of isoflurane also caused this sudden death (Nonneman et al. 2012), although it is unclear if the death was due to the isoflurane, per se, or the stress of forced breathing of isoflurane. Regardless, immediately prior to death during isoflurane inhalation, electrocardiogram (EKG) abnormalities were reported (Nonneman et al. 2012). Similarly, we found EKG abnormalities immediately prior to death resulting from acute stress (Figure 1). It is unclear if the ryanodine receptor is affected by dystrophin insufficiency in this model; however, recent evidence (Bellinger et al. 2009; Fauconnier et al. 2010) and a similar susceptibility to sudden death in BMD patients (Nigro et al. 2002) leads to the speculation that there may be post-translational ryanodine receptor modification due to dystrophin insufficiency. Importantly, hyperthermia was not present during stress-mediated death (unpublished observations).

### Current Approaches

While histological experiments provide compelling evidence that dystrophin insufficiency leads to disease-related injury in dystrophin-insufficient pigs, we are currently working to determine the extent to which it leads to impaired muscle function. This will provide an objective outcome measure so that disease progression can

be clearly tracked and establish a basis on which to evaluate interventions at the preclinical stage. Further, because it is clear in other species that dystrophin insufficiency causes lesions in skeletal muscle and leads to impaired muscle function, establishing this in the porcine model is critical. Currently, we are using changes in gait to objectively measure locomotor function. To accomplish this, pigs are observed as they walk on an ~15-meter linear track that contains an ~5-meter mat with embedded force transducers (Xeno, ProtoKinetics, Havertown, PA; Figure 2). While this is an ongoing study, our preliminary data indicate that, at three months of age, stride length is decreased (Figure 3) in affected pigs, and affected pigs do not roll through a step (strike to toe off) in the same fashion as healthy littermates (Selsby, Ross, Nonneman, Kaiser, unpublished observations). Such changes would be indicative of disease-related modifications to gait and locomotion much like those observed in human patients.

### Future Directions

To more fully characterize the model, we intend to measure respiratory function in these pigs because respiratory failure is a serious clinical concern for these patients. That these pigs have such a powerful and repeatable stress-induced death creates some hurdles that we are working to overcome. In an early attempt to measure respiratory function, we used respiratory inductive plethysmography in which bands are placed around the chest and abdomen of the pig. While we were successful in recording a signal, we were not able to calibrate the system due to fears that this process would trigger stress sufficient to kill the animal. We also considered surgical techniques; however, that precludes the possibility of longitudinal studies. We are currently exploring the possibility of using whole-body unrestrained plethysmography and have successfully performed this technique in mice (Selsby et al. 2014).

Of equal importance are changes in cardiac function, and the possibility of using the working heart or Langendorff approaches to measure cardiac function is foreseeable. We may also pursue in vivo imaging using magnetic resonance imaging (MRI) and have recently performed this measure in mice (Ballman et al. 2015; Beyers et al. 2015).

Aside from disease characterization, understanding the molecular mechanism leading to dystrophin insufficiency is important because it will help us to better understand the disease in this model but may also help us better understand similar causes in human patients. The reduction in dystrophin abundance is greater than was anticipated given the identified mutation. Full sequencing of the dystrophin gene did not reveal additional mutations (Nonneman et al. 2012). The mutation did not cause a new microRNA binding site, although the molecular properties of arginine and tryptophan differ. It is reasonable to suggest that this amino acid substitution changed the tertiary structure, making proteolytic attack more likely. Indeed, in silico digests suggest increased susceptibility to calpain (Hollinger et al. 2014). Even this, however, seems inadequate to explain the 70%–90% reduction in dystrophin protein abundance, suggesting that some other mechanism(s) are contributing to decreased dystrophin abundance. These may include decreased stability of the transcript, increased transcript degradation, or decreased protein stability.

### Summary

A variety of animal models have contributed to our understanding of dystrophinopathies and to therapy development. Deficiencies in these models necessitate the development of



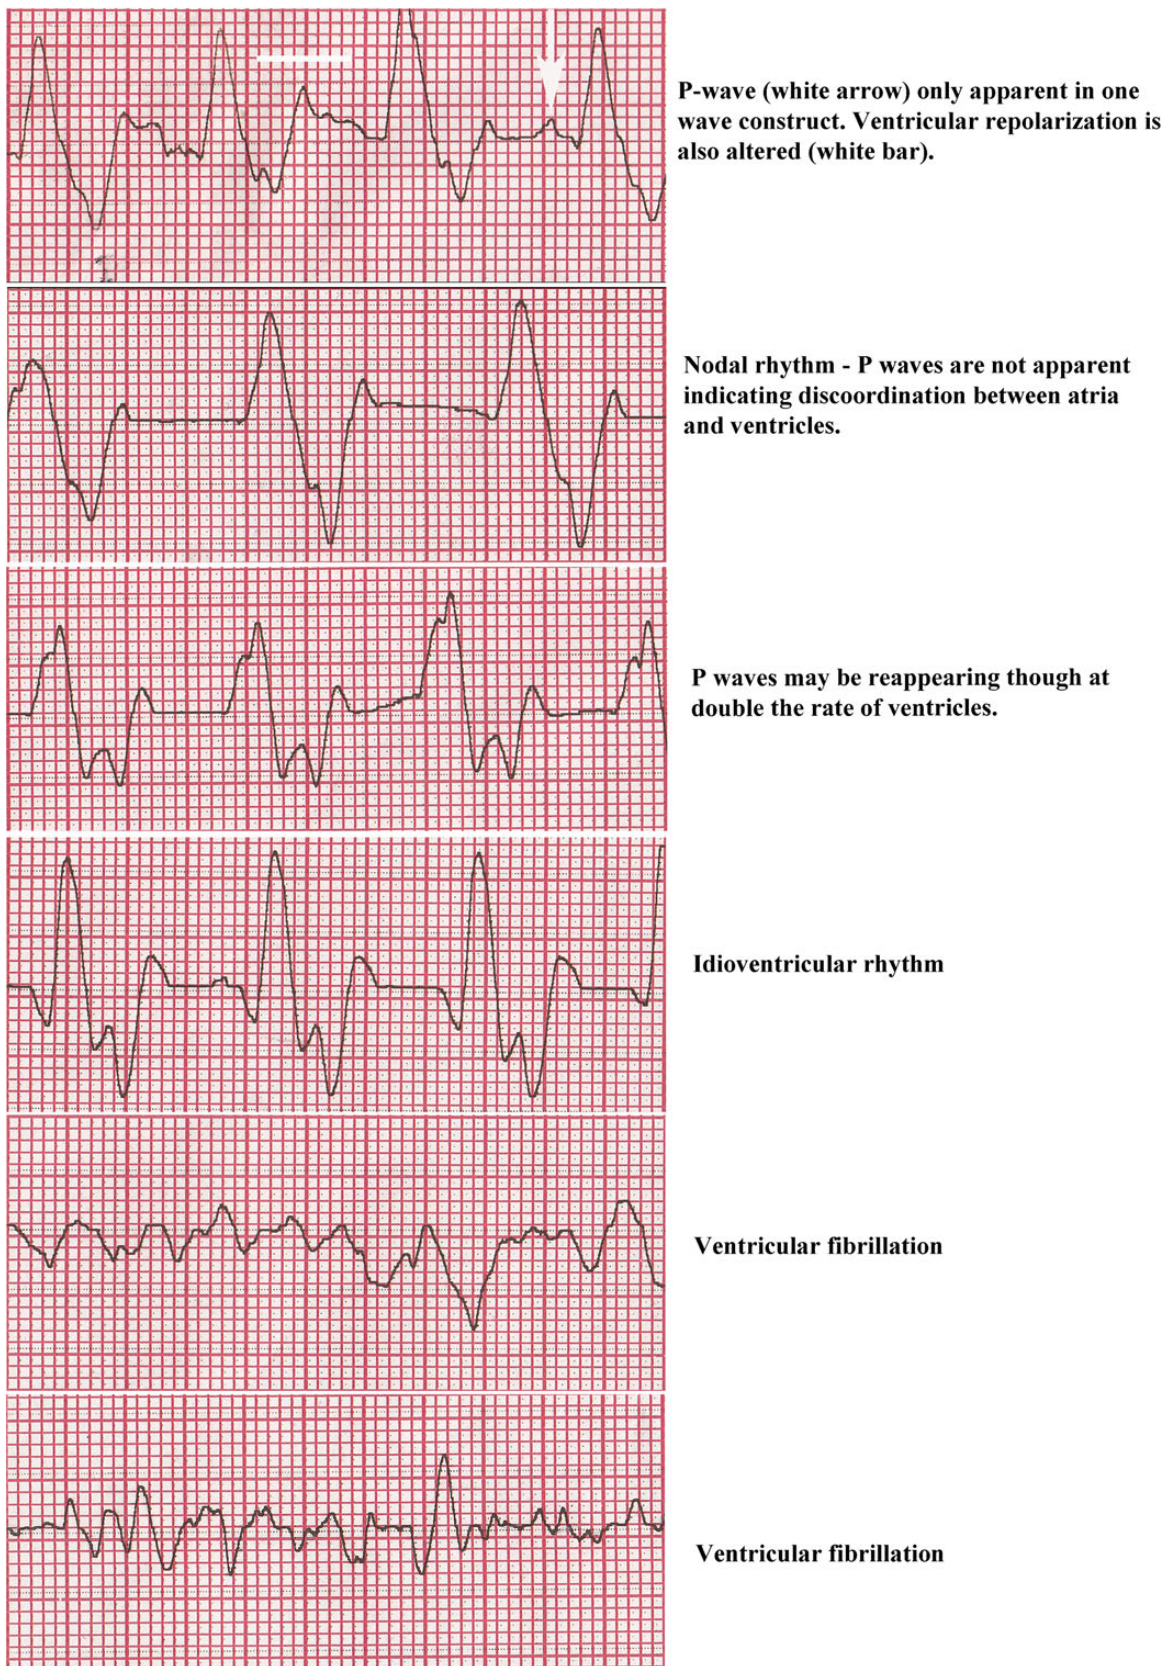

**Figure 1.** Dystrophic pigs have EKG abnormalities after acute stress. Fifteen minutes after a routine injection, a pig with dystrophin insufficiency collapsed and exhibited rapid, shallow breathing. EKG pads were applied within a few minutes to record electrical activity in the heart. Ultimately, the rhythm degraded to ventricular fibrillation and asystole. The entire duration from the onset of breathing abnormalities to death was less than 15 min. Similar recordings, along with an example from a healthy animal have been previously reported (Nonneman et al. 2012). These panels (in order) were taken over the final 8 min.

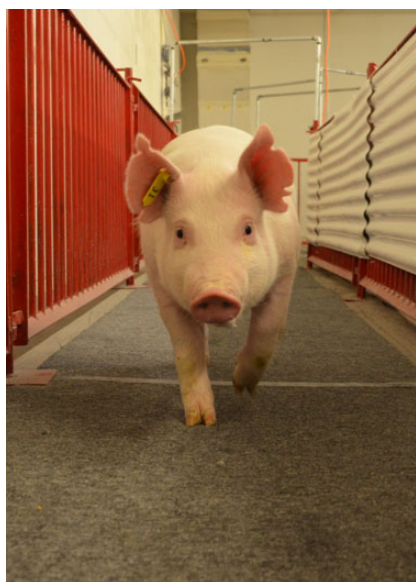

**Figure 2.** Gait analysis. The track is ~15 meters with the central 5 meters containing 33,000 embedded force transducers (Zeno, Protokinetics, Havertown, PA). The pigs walked back and forth across the track, and data are collected bidirectionally.

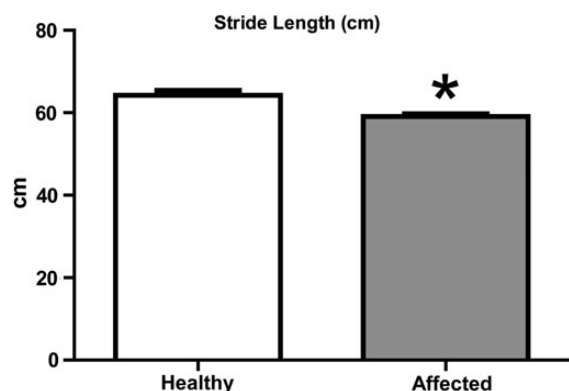

**Figure 3.** Gait abnormalities in dystrophic pigs. Using the system indicated in Figure 2, data were collected on ~10 walks/pig, which were generally accomplished in a total of 14 walks over ~15 min/pig. At 3 months of age, stride length was decreased in dystrophic ( $n=8$ ) pigs compared with healthy littermates ( $n=9$ ). In this preliminary analysis, factors including body weight and limb length were not included in the statistical model but did not differ between groups. \* indicates significantly different from healthy;  $p < 0.05$ .

novel, large-animal models as preclinical tools. The pig represents a human-sized animal that shares many anatomical and physiological features with humans, including the cardiovascular system, which is of importance in the study of dystrophinopathies. Several pig models are being developed by different groups, and we have recently described work characterizing a porcine model with a dystrophin insufficiency and associated muscle injury. We are in the process of characterizing disease progression and are developing techniques to objectively measure physiological outcomes. We are also pursuing the measurement of respiratory and cardiac function. In total, porcine dystrophinopathy models hold tremendous promise as preclinical models in the drug and therapy development pipeline for the treatment of boys afflicted with dystrophinopathies.

## Acknowledgments

Work was supported by grants NS079603 (JTS) and RR030232 (JWR) from NIH and by the USDA.

## References

- Aartsma-Rus A, Van Deutekom JC, Fokkema IF, Van Ommen GJ, Den Dunnen JT. 2006. Entries in the Leiden Duchenne muscular dystrophy mutation database: an overview of mutation types and paradoxical cases that confirm the reading-frame rule. *Muscle Nerve* 34:135–144.
- Alexander MS, Kawahara G, Motohashi N, Casar JC, Eisenberg I, Myers JA, Gasperini MJ, Estrella EA, Kho AT, Mitsuhashi S, Shapiro F, Kang PB, Kunkel LM. 2013. MicroRNA-199a is induced in dystrophic muscle and affects WNT signaling, cell proliferation, and myogenic differentiation. *Cell Death Differ* 20:1194–1208.
- Ambrosio CE, Valadares MC, Zucconi E, Cabral R, Pearson PL, Gaiad TP, Canovas M, Vainzof M, Miglino MA, Zatz M. 2008. Ringo, a Golden Retriever Muscular Dystrophy (GRMD) dog with absent dystrophin but normal strength. *Neuromuscul Disord* 18:892–893.
- Anthony K, Feng L, Arechavala-Gomez V, Guglieri M, Straub V, Bushby K, Cirak S, Morgan J, Muntoni F. 2012. Exon skipping quantification by quantitative reverse-transcription polymerase chain reaction in Duchenne muscular dystrophy patients treated with the antisense oligomer eteplirsen. *Hum Gene Ther Methods* 23:336–345.
- Ballman C, Beyer RJ, Denney TS, Selsby JT, Quindry JC. Effect of chronic dietary quercetin enrichment on cardiac function in dystrophic mice. *Experimental Biology*, March 2015, Boston, MA.
- Banks GB, Chamberlain JS. 2008. The value of mammalian models for duchenne muscular dystrophy in developing therapeutic strategies. *Curr Top Dev Biol* 84:431–453.
- Basset O, Boittin FX, Cognard C, Constantin B, Ruegg UT. 2006. Bcl-2 overexpression prevents calcium overload and subsequent apoptosis in dystrophic myotubes. *Biochem J* 395:267–276.
- Bassett DI, Bryson-Richardson RJ, Daggett DF, Gautier P, Keenan DG, Currie PD. 2003. Dystrophin is required for the formation of stable muscle attachments in the zebrafish embryo. *Development* 130:5851–5860.
- Beggs AH, Hoffman EP, Snyder JR, Arahata K, Specht L, Shapiro F, Angelini C, Sugita H, Kunkel LM. 1991. Exploring the molecular basis for variability among patients with Becker muscular dystrophy: dystrophin gene and protein studies. *Am J Hum Genet* 49:54–67.
- Bellinger AM, Reiken S, Carlson C, Mongillo M, Liu X, Rothman L, Matecki S, Lacampagne A, Marks AR. 2009. Hypernitrosylated ryanodine receptor calcium release channels are leaky in dystrophic muscle. *Nat Med* 15:325–330.
- Berger J, Berger S, Jacoby AS, Wilton SD, Currie PD. 2011. Evaluation of exon-skipping strategies for Duchenne muscular dystrophy utilizing dystrophin-deficient zebrafish. *J Cell Mol Med* 15:2643–2651.
- Berger J, Sztal T, Currie PD. 2012. Quantification of birefringence readily measures the level of muscle damage in zebrafish. *Biochem Biophys Res Commun* 423:785–788.
- Beyers RJ, Ballman C, Selsby JT, Salidi N, Quindry JC, Denney TS. Whole-heart T2-mapping at 7T quantifies dystrophic myocardial pathology in mdx/utrn+/- mice. *International Society for Magnetic Resonance in Medicine*; May 30–31 2015; Toronto, Ontario, Canada.



- Blake DJ, Tinsley JM, Davies KE. 1996. Utrophin: a structural and functional comparison to dystrophin. *Brain Pathol* 6:37–47.
- Bretag AH. 2007. Stem cell treatment of dystrophic dogs. *Nature* 450:E23; discussion E23–5.
- Bulfield G, Siller WG, Wight PA, Moore KJ. 1984. X chromosome-linked muscular dystrophy (mdx) in the mouse. *Proc Natl Acad Sci USA* 81:1189–1192.
- Carpenter JL, Hoffman EP, Romanul FC, Kunkel LM, Rosales RK, Ma NS, Dasbach JJ, Rae JF, Moore FM, McAfee MB. 1989. Feline muscular dystrophy with dystrophin deficiency. *Am J Pathol* 135:909–919.
- Chamberlain JS, Metzger J, Reyes M, Townsend D, Faulkner JA. 2007. Dystrophin-deficient mdx mice display a reduced life span and are susceptible to spontaneous rhabdomyosarcoma. *FASEB J* 21:2195–2204.
- Chambers SP, Dodd A, Overall R, Sirey T, Lam LT, Morris GE, Love DR. 2001. Dystrophin in adult zebrafish muscle. *Biochem Biophys Res Commun* 286:478–483.
- Cohn RD, Henry MD, Michele DE, Barresi R, Saito F, Moore SA, Flanagan JD, Skwarchuk MW, Robbins ME, Mendell JR, Williamson RA, Campbell KP. 2002. Disruption of DAG1 in differentiated skeletal muscle reveals a role for dystroglycan in muscle regeneration. *Cell* 110:639–648.
- Cooper BJ, Winand NJ, Stedman H, Valentine BA, Hoffman EP, Kunkel LM, Scott MO, Fischbeck KH, Kornegay JN, Avery RJ. 1988. The homologue of the Duchenne locus is defective in X-linked muscular dystrophy of dogs. *Nature* 334:154–156.
- Cox GA, Phelps SF, Chapman VM, Chamberlain JS. 1993. New mdx mutation disrupts expression of muscle and nonmuscle isoforms of dystrophin. *Nat Genet* 4:87–93.
- Crick SJ, Sheppard MN, Ho SY, Gebstein L, Anderson RH. 1998. Anatomy of the pig heart: comparisons with normal human cardiac structure. *J Anat* 193(Pt 1):105–119.
- Deconinck AE, Rafael JA, Skinner JA, Brown SC, Potter AC, Metzinger L, Watt DJ, Dickson JG, Tinsley JM, Davies KE. 1997. Utrophin-dystrophin-deficient mice as a model for Duchenne muscular dystrophy. *Cell* 90:717–727.
- De Palma C, Perrotta C, Pellegrino P, Clementi E, Cervia D. 2014. Skeletal muscle homeostasis in duchenne muscular dystrophy: modulating autophagy as a promising therapeutic strategy. *Front Aging Neurosci* 6:188.
- Duan D. 2011. Duchenne muscular dystrophy gene therapy: Lost in translation? *Res Rep Biol* 2011:31–42.
- Ewen CL, Cino-Ozuna AG, He H, Kerrigan MA, Dekkers JC, Tuggle CK, Rowland RR, Wyatt CR. 2014. Analysis of blood leukocytes in a naturally occurring immunodeficiency of pigs shows the defect is localized to B and T cells. *Vet Immunol Immunopath* 162:174–179.
- Ezzelarab M, Garcia B, Azimzadeh A, Sun H, Lin CC, Hara H, Kelishadi S, Zhang T, Lin YJ, Tai HC, Wagner R, Thacker J, Murase N, McCurry K, Barth RN, Ayares D, Pierson RN, Cooper DK. 2009. The innate immune response and activation of coagulation in alpha1,3-galactosyltransferase gene-knockout xenograft recipients. *Transplantation* 87:805–812.
- Fauconnier J, Thireau J, Reiken S, Cassan C, Richard S, Matecki S, Marks AR, Lacampagne A. 2010. Leaky RyR2 trigger ventricular arrhythmias in Duchenne muscular dystrophy. *Proc Natl Acad Sci USA* 107:1559–1564.
- Fortunato MJ, Ball CE, Hollinger K, Patel NB, Modi JN, Rajasekaran V, Nonneman DJ, Ross JW, Kennedy EJ, Selsby JT, Beedle AM. 2014. Development of rabbit monoclonal antibodies for detection of alpha-dystroglycan in normal and dystrophic tissue. *PLoS One* 9:e97567.
- Franco A Jr., Lansman JB. 1990. Calcium entry through stretch-activated ion channels in mdx myotubes. *Nature* 344:670–673.
- Fujii J, Otsu K, Zorzato F, de Leon S, Khanna VK, Weiler JE, O'Brien PJ, MacLennan DH. 1991. Identification of a mutation in porcine ryanodine receptor associated with malignant hyperthermia. *Science* 253:448–451.
- Gambino AN, Mouser PJ, Shelton GD, Winand NJ. 2014. Emergent presentation of a cat with dystrophin-deficient muscular dystrophy. *J Am Anim Hosp Assoc* 50:130–135.
- Gaschen FP, Hoffman EP, Gorospe JR, Uhl EW, Senior DF, Cardinet GH 3rd, Pearce LK. 1992. Dystrophin deficiency causes lethal muscle hypertrophy in cats. *J Neurol Sci* 110:149–159.
- Gregorevic P, Allen JM, Minami E, Blankinship MJ, Haraguchi M, Meuse L, Finn E, Adams ME, Froehner SC, Murry CE, Chamberlain JS. 2006. rAAV6-microdystrophin preserves muscle function and extends lifespan in severely dystrophic mice. *Nat Med* 12:787–789.
- Gregorevic P, Blankinship MJ, Allen JM, Chamberlain JS. 2008. Systemic microdystrophin gene delivery improves skeletal muscle structure and function in old dystrophic mdx mice. *Molecular Therapy* 16:657–664.
- Guyon JR, Goswami J, Jun SJ, Thorne M, Howell M, Pusack T, Kawahara G, Steffen LS, Galdzicki M, Kunkel LM. 2009. Genetic isolation and characterization of a splicing mutant of zebrafish dystrophin. *Hum Mol Genet* 18:202–211.
- Hollinger K, Gardan-Salmon D, Santana C, Rice D, Snella E, Selsby JT. 2013. Rescue of dystrophic skeletal muscle by PGC-1alpha involves restored expression of dystrophin-associated protein complex components and satellite cell signaling. *Am J Physiol Regul Integr Comp Physiol* 305:R13–R23.
- Hollinger K, Yang CX, Montz RE, Nonneman D, Ross JW, Selsby JT. 2014. Dystrophin insufficiency causes selective muscle histopathology and loss of dystrophin-glycoprotein complex assembly in pig skeletal muscle. *FASEB J* 28:1600–1609.
- Im WB, Phelps SF, Copen EH, Adams EG, Slightom JL, Chamberlain JS. 1996. Differential expression of dystrophin isoforms in strains of mdx mice with different mutations. *Hum Mol Genet* 5:1149–1153.
- Kawahara G, Karpf JA, Myers JA, Alexander MS, Guyon JR, Kunkel LM. 2011. Drug screening in a zebrafish model of Duchenne muscular dystrophy. *Proc Natl Acad Sci USA* 108:5331–5336.
- Klymiuk N, Blutke A, Graf A, Krause S, Burkhardt K, Wuensch A, Krebs S, Kessler B, Zakhartchenko V, Kurome M, Kemter E, Nagashima H, Schoer B, Herbach N, Blum H, Wanke R, Aartsma-Rus A, Thirion C, Lochmüller H, Walter MC, Wolf E. 2013. Dystrophin-deficient pigs provide new insights into the hierarchy of physiological derangements of dystrophic muscle. *Hum Mol Genet* 22:4368–4382.
- Koenig M, Hoffman EP, Bertelson CJ, Monaco AP, Feener C, Kunkel LM. 1987. Complete cloning of the Duchenne muscular dystrophy (DMD) cDNA and preliminary genomic organization of the DMD gene in normal and affected individuals. *Cell* 50:509–517.
- Kon ND, Cordell AR, Adair SM, Dobbins JE, Kitzman DW. 1999. Aortic root replacement with the freestyle stentless porcine aortic root bioprosthesis. *Ann Thorac Surg* 67:1609–1615; discussion 1615–6.
- Kornegay JN, Cundiff DD, Bogan DJ, Bogan JR, Okamura CS. 2003. The cranial sartorius muscle undergoes true hypertrophy in dogs with golden retriever muscular dystrophy. *Neuromuscul Disord* 13:493–500.

- Kudoh H, Ikeda H, Kakitani M, Ueda A, Hayasaka M, Tomizuka K, Hanaoka K. 2005. A new model mouse for Duchenne muscular dystrophy produced by 2.4 Mb deletion of dystrophin gene using Cre-loxP recombination system. *Biochem Biophys Res Commun* 328:507–516.
- Lai LX, Kolber-Simonds D, Park KW, Cheong HT, Greenstein JL, Im GS, Samuel M, Bonk A, Rieke A, Day BN, Murphy CN, Carter DB, Hawley RJ, Prather RS. 2002. Production of alpha-1,3-galactosyltransferase knockout pigs by nuclear transfer cloning. *Science* 295:1089–1092.
- Laing NG. 1993. Molecular genetics and genetic counselling for Duchenne/Becker muscular dystrophy. *Mol Cell Biol Hum Dis Ser* 3:37–84.
- Lansman JB, Franco-Obregon A. 2006. Mechanosensitive ion channels in skeletal muscle: a link in the membrane pathology of muscular dystrophy. *Clin Exp Pharmacol Physiol* 33:649–656.
- Larcher T, Lafoux A, Tesson L, Remy S, Thepenier V, François V, Le Guiner C, Goubin H, Dutilleul M, Guigand L, Toumaniantz G, De Cian A, Boix C, Renaud JB, Cherel Y, Giovannangeli C, Concordet JP, Anegon I, Huchet C. 2014. Characterization of dystrophin deficient rats: a new model for duchenne muscular dystrophy. *PLoS One* 9:e110371.
- Law DJ, Allen DL, Tidball JG. 1994. Talin, vinculin and DRP (utrophin) concentrations are increased at mdx myotendinous junctions following onset of necrosis. *J Cell Sci* 107 (Pt 6):1477–1483.
- LeMaire SA, Green SY, Sharma K, Cheung CK, Sameri A, Tsai PI, Adams G, Coselli JS. 2009. Aortic root replacement with stentless porcine xenografts: early and late outcomes in 132 patients. *Ann Thorac Surg* 87:503–512; discussion 512–3.
- Le Rumeur E, Winder SJ, Hubert JF. 2010. Dystrophin: more than just the sum of its parts. *Biochim Biophys Acta* 1804:1713–1722.
- Li D, Bareja A, Judge L, Yue Y, Lai Y, Fairclough R, Davies KE, Chamberlain JS, Duan D. 2010. Sarcolemmal nNOS anchoring reveals a qualitative difference between dystrophin and utrophin. *J Cell Sci* 123(Pt 12):2008–2013.
- Li M, Andersson-Lendahl M, Sejersen T, Arner A. 2014. Muscle dysfunction and structural defects of dystrophin-null sapje mutant zebrafish larvae are rescued by ataluren treatment. *FASEB J* 28:1593–1599.
- Liu JM, Okamura CS, Bogan DJ, Bogan JR, Childers MK, Kornegay JN. 2004. Effects of prednisone in canine muscular dystrophy. *Muscle Nerve* 30:767–773.
- Liu M, Yue Y, Harper SQ, Grange RW, Chamberlain JS, Duan D. 2005. Adeno-associated virus-mediated microdystrophin expression protects young mdx muscle from contraction-induced injury. *Mol Ther* 11:245–256.
- Ljubicic V, Miura P, Burt M, Boudreault L, Khogali S, Lunde JA, Renaud JM, Jasmin BJ. 2011. Chronic AMPK activation evokes the slow, oxidative myogenic program and triggers beneficial adaptations in mdx mouse skeletal muscle. *Hum Mol Genet* 20:3478–3493.
- Lynch GS. 2004. Role of contraction-induced injury in the mechanisms of muscle damage in muscular dystrophy. *Clin Exp Pharmacol Physiol* 31:557–561.
- Maxmen A. 2012. Model pigs face messy path. *Nature* 486:453.
- McNally EM. 2007. New approaches in the therapy of cardiomyopathy in muscular dystrophy. *Annu Rev Med* 58:75–88.
- Mendell JR, Campbell K, Rodino-Klapac L, Sahenk Z, Shilling C, Lewis S, Bowles D, Gray S, Li CW, Galloway G. 2010. Brief Report: Dystrophin Immunity in Duchenne's Muscular Dystrophy. *N Eng J Med* 363:1429–1437.
- Mendell JR, Rodino-Klapac LR, Rosales XQ, Coley BD, Galloway G, Lewis S, Malik V, Shilling C, Byrne BJ, Conlon T. 2010. Sustained Alpha-Sarcoglycan Gene Expression after Gene Transfer in Limb-Girdle Muscular Dystrophy, Type 2D. *Ann Neurol* 68:629–638.
- Mendell JR, Rodino-Klapac LR, Sahenk Z, Roush K, Bird L, Lowes LP, Alfano L, Gomez AM, Lewis S, Kota J, Malik V, Shontz K, Walker CM, Flanigan KM, Corridore M, Kean JR, Allen HD, Shilling C, Melia KR, Sazani P, Saoud JB, Kaye EM. 2013. Eteplirsen for the treatment of Duchenne muscular dystrophy. *Ann Neurol* 74:637–647.
- Mingozzi F, Maus MV, Hui DJ, Sabatino DE, Murphy SL, Rasko JEJ, Ragni MV, Manno CS, Sommer J, Jiang HY, Pierce GF, Ertl HC, High KA. 2007. CD8+ T-cell responses to adeno-associated virus capsid in humans. *Nature Medicine* 13:419–422.
- Moens P, Baatsen PH, Marechal G. 1993. Increased susceptibility of EDL muscles from mdx mice to damage induced by contractions with stretch. *J Muscle Res Cell Motil* 14:446–451.
- Morris CA, Selsby JT, Morris LD, Pendrak K, Sweeney HL. 2010. Bowman-Birk inhibitor attenuates dystrophic pathology in mdx mice. *J Appl Physiol* 109:1492–1499.
- Muntoni F, Torelli S, Ferlini A. 2003. Dystrophin and mutations: one gene, several proteins, multiple phenotypes. *Lancet Neurol* 2:731–740.
- Nakamura K, Fujii W, Tsuboi M, Tanihata J, Teramoto N, Takeuchi S, Naito K, Yamanouchi K, Nishihara M. 2014. Generation of muscular dystrophy model rats with a CRISPR/Cas system. *Sci Rep* 4:5635.
- Nicolas A, Raguene-Nicol C, Ben Yaou R, Ameziane-Le Hir S, Cheron A, Vie V, Claustres M, Leturcq F, Delalande O, Hubert JF, Tuffery-Giraud S, Giudice E, Le Rumeur E. 2015. Becker muscular dystrophy severity is linked to the structure of dystrophin. *Hum Mol Genet* 24:1267–1279.
- Nigro G, Nigro G, Politano L, Santangelo L, Petretta VR, Passamano L, Panico F, De Luca F, Montefusco A, Comi LI. 2002. Is the value of QT dispersion a valid method to foresee the risk of sudden death? A study in Becker patients. *Heart* 87:156–157.
- Nonneman DN, Brown-Brandl T, Jones SA, Wiedmann RT, Rohrer GA. 2012. A defect in dystrophin causes a novel porcine stress syndrome. *BMC Genomics* 13:233.
- Odom GL, Gregorevic P, Allen JM, Finn E, Chamberlain JS. 2008. Microtrophin delivery through rAAV6 increases lifespan and improves muscle function in dystrophic dystrophin/utrophin-deficient mice. *Mol Ther* 16:1539–1545.
- Petrof BJ, Shrager JB, Stedman HH, Kelly AM, Sweeney HL. 1993. Dystrophin protects the sarcolemma from stresses developed during muscle contraction. *Proc Natl Acad Sci USA* 90:3710–3714.
- Prather RS, Lorson M, Ross JW, Whyte JJ, Walters E. 2013. Genetically engineered pig models for human diseases. *Ann Rev Anim Biosci* 1:203–220.
- Rafael JA, Townsend ER, Squire SE, Potter AC, Chamberlain JS, Davies KE. 2000. Dystrophin and utrophin influence fiber type composition and post-synaptic membrane structure. *Hum Mol Genet* 9:1357–1367.
- Ramos AM, Crooijmans RP, Affara NA, Amaral AJ, Archibald AL, Beever JE, Bendixen C, Churcher C, Clark R, Dehais P, Hansen MS, Hedegaard J, Hu ZL, Kerstens HH, Law AS, Megens HJ, Milan D, Nonneman DJ, Rohrer GA, Rothschild MF, Smith TP, Schnabel RD, Van Tassel CP, Taylor JF, Wiedmann RT, Schook LB, Groenen MA. 2009. Design of a high density SNP genotyping assay in the pig

- using SNPs identified and characterized by next generation sequencing technology. *PLoS One* 4:e6524.
- Rogers CS, Stoltz DA, Meyerholz DK, Ostedgaard LS, Rokhlina T, Taft P, Rogan MP, Pezzulo AA, Karp PH, Itani OA, Kabel AC, Wohlford-Lenane CL, Davis GJ, Hanfland RA, Smith TL, Samuel M, Wax D, Murphy CN, Rieke A, Whitworth K, Uc A, Starner TD, Brogden KA, Shilyansky J, McCray PB, Zabner J, Prather RS, Welsh MJ. 2008. Disruption of the CFTR gene produces a model of cystic fibrosis in newborn piglets. *Science* 321:1837–1841.
- Ross JW, Fernandez-Castro J, Zhao J, Samuel M, Walters EM, Rios C, Bray-Ward P, Wang W, Zhou L, Noel JM. 2012. Generation of an inbred miniature pig model of retinitis pigmentosa. *Invest Ophthalmol Vis Sci* 53:501–507.
- Sacco A, Mourkioti F, Tran R, Choi J, Llewellyn M, Kraft P, Shkreli M, Delp S, Pomerantz JH, Artandi SE, Blau HM. 2010. Short telomeres and stem cell exhaustion model Duchenne muscular dystrophy in mdx/mTR mice. *Cell* 143:1059–1071.
- Schatzberg SJ, Anderson LV, Wilton SD, Kornegay JN, Mann CJ, Solomon GG, Sharp NJ. 1998. Alternative dystrophin gene transcripts in golden retriever muscular dystrophy. *Muscle Nerve* 21:991–998.
- Selsby J, Pendrak K, Zadel M, Tian Z, Pham J, Carver T, Acosta P, Barton E, Sweeney HL. 2010. Leupeptin-based inhibitors do not improve the mdx phenotype. *Am J Physiol Regul Integr Comp Physiol* 299:R1192–R1201.
- Selsby JT. 2011. Increased catalase expression improves muscle function in mdx mice. *Exp Physiol* 96:194–202.
- Selsby JT, Ballman C, Quindry JC. 2014. Dietary Quercetin Enrichment Improves Respiratory Function in mdx Mice. *FASEB J* 28 Suppl 1: 884.17.
- Selsby JT, Morine KJ, Pendrak K, Barton ER, Sweeney HL. 2012. Rescue of dystrophic skeletal muscle by PGC-1alpha involves a fast to slow fiber type shift in the mdx mouse. *PLoS One* 7:e30063.
- Sharp NJ, Kornegay JN, Van Camp SD, Herbstreith MH, Secore SL, Kettle S, Hung WY, Constantinou CD, Dykstra MJ, Roses AD. 1992. An error in dystrophin mRNA processing in golden retriever muscular dystrophy, an animal homologue of Duchenne muscular dystrophy. *Genomics* 13:115–121.
- Shimatsu Y, Katagiri K, Furuta T, Nakura M, Tanioka Y, Yuasa K, Tomohiro M, Kornegay JN, Nonaka I, Takeda S. 2003. Canine X-linked muscular dystrophy in Japan (CXMDJ). *Exp Anim* 52:93–97.
- Shin JH, Pan X, Hakim CH, Yang HT, Yue Y, Zhang K, Terjung RL, Duan D. 2013. Microdystrophin ameliorates muscular dystrophy in the canine model of duchenne muscular dystrophy. *Mol Ther* 21:750–757.
- Spencer MJ, Mellgren RL. 2002. Overexpression of a calpastatin transgene in mdx muscle reduces dystrophic pathology. *Hum Mol Genet* 11:2645–2655.
- Tews DS. 2006. Characterization of initiator and effector caspase expressions in dystrophinopathies. *Neuropathology* 26:24–31.
- Thein E, Hammer C. 2004. Physiological barriers to xenotransplantation. *Curr Opin Organ Transplant* 9:186–189.
- Tidball JG, Wehling-Henricks M. 2007. The role of free radicals in the pathophysiology of muscular dystrophy. *J Appl Physiol* 102:1677–1686.
- Tinsley J, Deconinck N, Fisher R, Kahn D, Phelps S, Gillis JM, Davies K. 1998. Expression of full-length utrophin prevents muscular dystrophy in mdx mice. *Nat Med* 4:1441–1444.
- Tutdibi O, Brinkmeier H, Rudel R, Fohr KJ. 1999. Increased calcium entry into dystrophin-deficient muscle fibres of MDX and ADR-MDX mice is reduced by ion channel blockers. *J Physiol* 515(Pt 3):859–868.
- Vandebrouck A, Ducret T, Basset O, Seville S, Raymond G, Ruegg U, Gailly P, Cognard C, Constantin B. 2006. Regulation of store-operated calcium entries and mitochondrial uptake by minidystrophin expression in cultured myotubes. *FASEB J* 20:136–138.
- Waugh TA, Horstick E, Hur J, Jackson SW, Davidson AE, Li X, Dowling JJ. 2014. Fluoxetine prevents dystrophic changes in a zebrafish model of Duchenne muscular dystrophy. *Hum Mol Genet* 23:4651–4662.
- Webster C, Silberstein L, Hays AP, Blau HM. 1988. Fast muscle fibers are preferentially affected in Duchenne muscular dystrophy. *Cell* 52:503–513.
- Weiss EH, Lilienfeld BG, Muller S, Muller E, Herbach N, Kessler B, Wanke R, Schwitzer R, Seebach JD, Wolf E, Brem G. 2009. HLA-E/human beta2-microglobulin transgenic pigs: protection against xenogeneic human anti-pig natural killer cell cytotoxicity. *Transplantation* 87:35–43.
- Wells DJ, Wells KE. 2005. What do animal models have to tell us regarding Duchenne muscular dystrophy? *Acta Myol* 24:172–180.
- Wernersson R, Schierup MH, Jorgensen FG, Gorodkin J, Panitz F, Staerfeldt HH, Christensen OF, Mailund T, Hornshoj H, Klein A, Wang J, Liu B, Hu S, Dong W, Li W, Wong GK, Yu J, Wang J, Bendixen C, Fredholm M, Brunak S, Yang H, Bolund L. 2005. Pigs in sequence space: a 0.66X coverage pig genome survey based on shotgun sequencing. *BMC Genomics* 6:70.
- Wertz K, Fuchtbauer EM. 1998. Dmd(mdx-beta geo): a new allele for the mouse dystrophin gene. *Dev Dyn* 212:229–241.
- Whitworth KM, Lee K, Benne JA, Beaton BP, Spate LD, Murphy SL, Samuel MS, Mao J, O’Gorman C, Walters EM, Murphy CN, Driver J, Mileham A, McLaren D, Wells KD, Prather RS. 2014. Use of the CRISPR/Cas9 system to produce genetically engineered pigs from in vitro-derived oocytes and embryos. *Biology of Reproduction* 91:78.
- Winand NJ, Edwards M, Pradhan D, Berian CA, Cooper BJ. 1994. Deletion of the dystrophin muscle promoter in feline muscular dystrophy. *Neuromuscul Disord* 4:433–445.
- Yang CX, Ross JW. 2012. Genetic modification of domestic animals for agriculture and biomedical applications. In: Ghista DN, eds. *Biomedical Science, Engineering and Technology*. Rijeka, Croatia: InTech Publishing.
- Zhang Y, Duan D. 2012. Novel mini-dystrophin gene dual adeno-associated virus vectors restore neuronal nitric oxide synthase expression at the sarcolemma. *Hum Gene Ther* 23:98–103.
